# Supplementary material
Source: PubMed Central journal article supplement (PMC10100117)
Supplement: 40900_2023_412_MOESM1_ESM.pdf [file 40900_2023_412_MOESM1_ESM.pdf]

# Opportunities and Obstacles for People Living With Heart Failure

Heart failure (HF) exerts an enormous toll on patients and society:<sup>1,2</sup>

- Social isolation
- Mental health issues
- Reduced ability to work
- Reduced quality of life
- Increased risk of death
- Costs

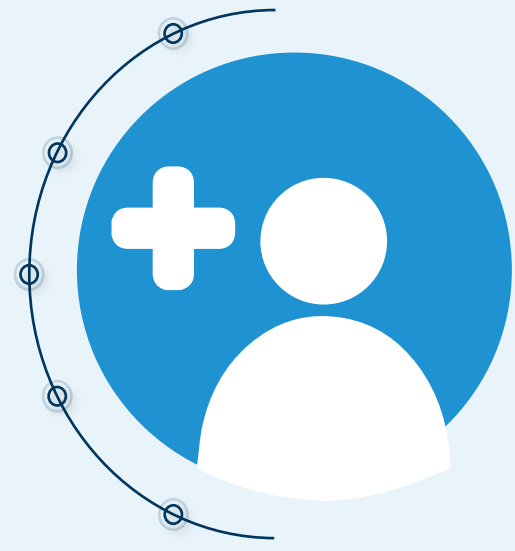

Globally, HF affects **64 million people**<sup>1</sup>

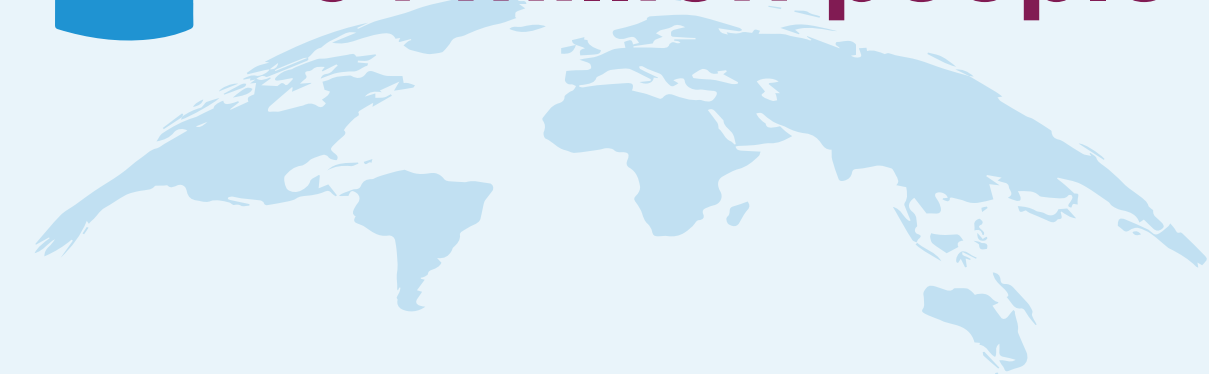

## Rehospitalizations

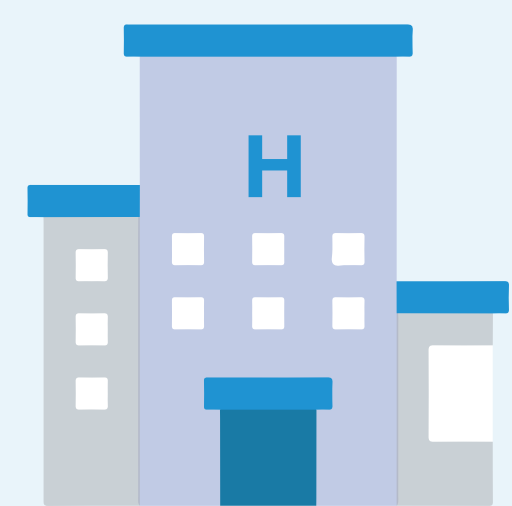

**21%** within 30 days of discharge<sup>3</sup>

**61%** within 1 year of discharge<sup>4</sup>

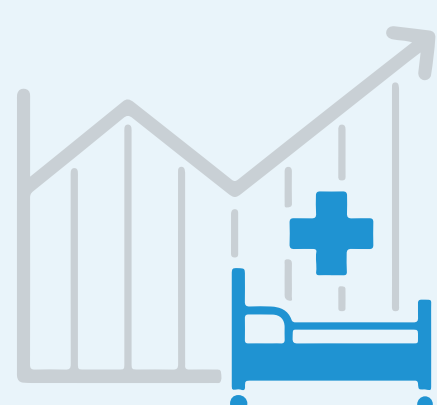

Prior hospitalization for HF is associated with an increased risk of death from any cause<sup>5</sup>

## The transition from hospital to home is difficult<sup>6-11</sup>

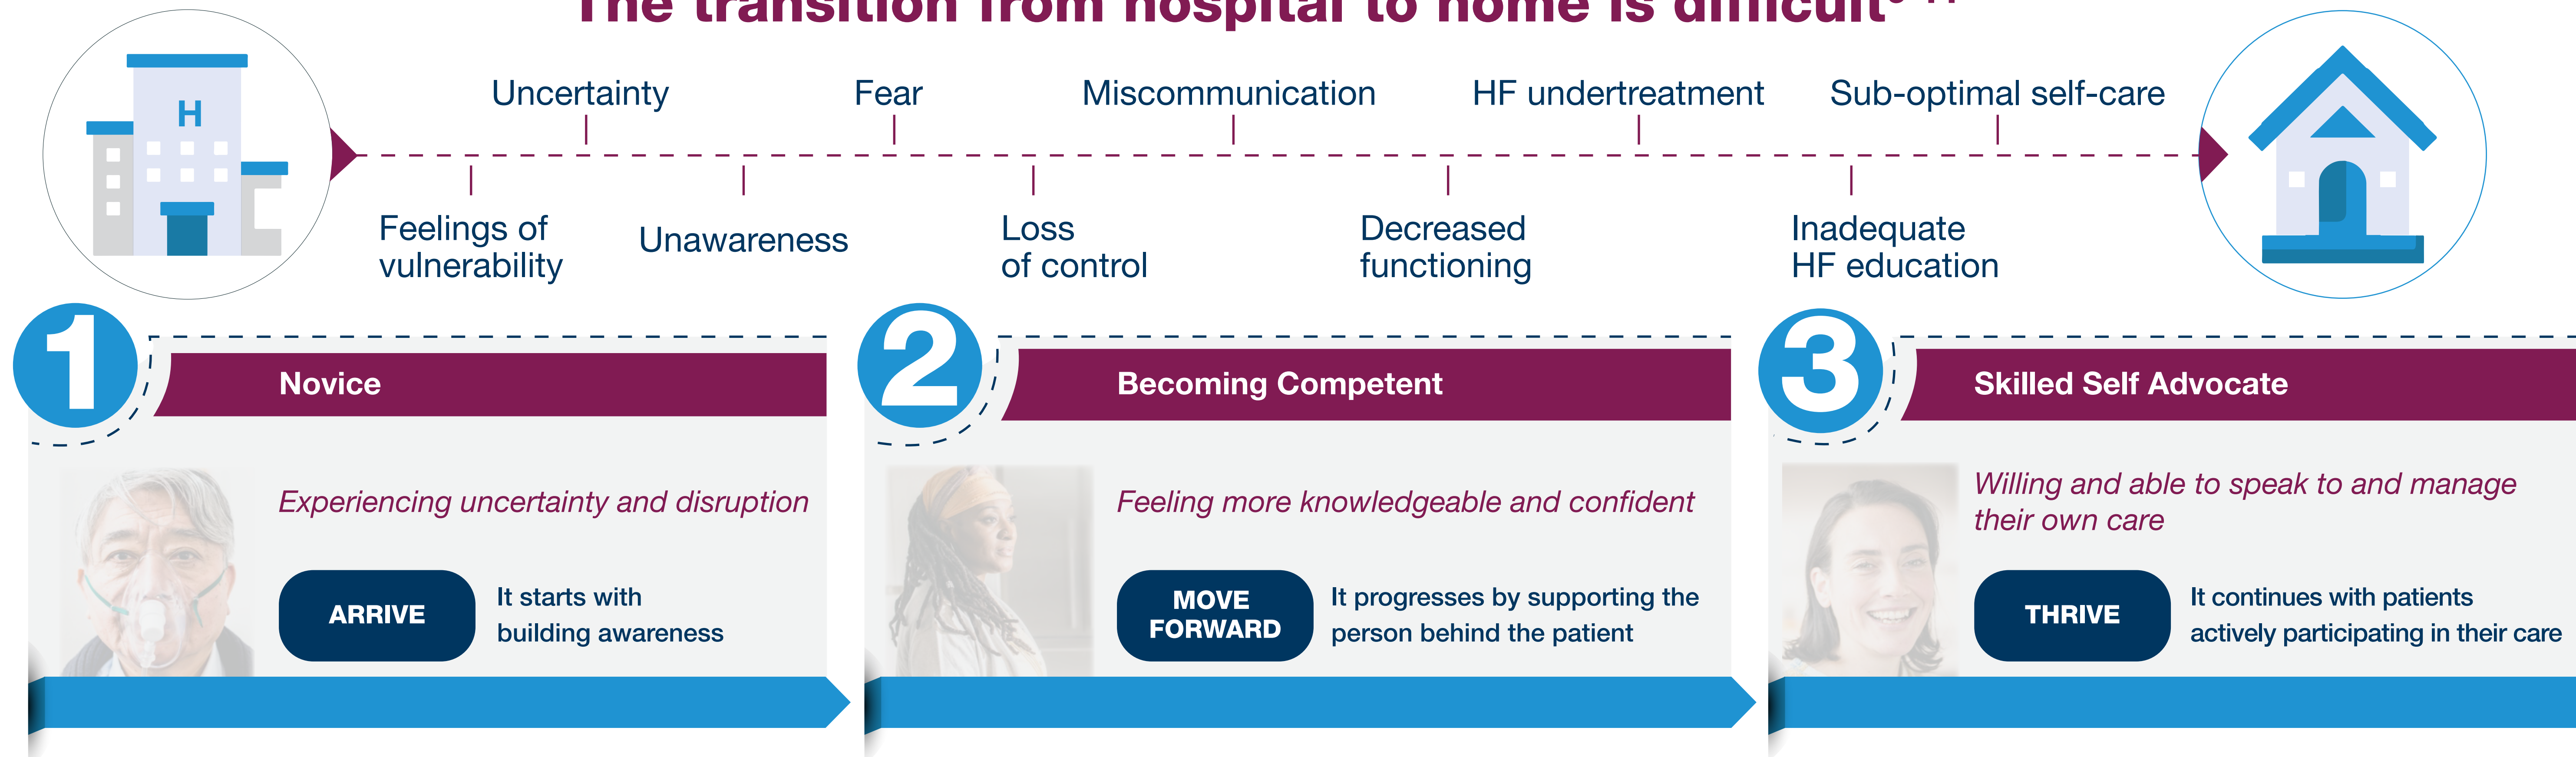

## Focus on opportunities for improvement to transform patient management

Self-care and education of people living with HF post-hospital discharge should be improved

Transitional-care programs for people living with HF are recommended by cardiology guidelines

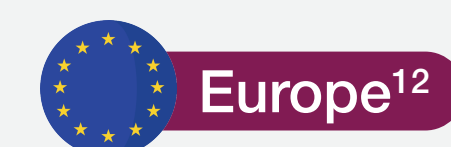

Europe<sup>12</sup>

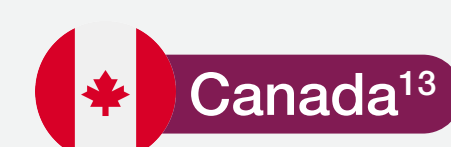

Canada<sup>13</sup>

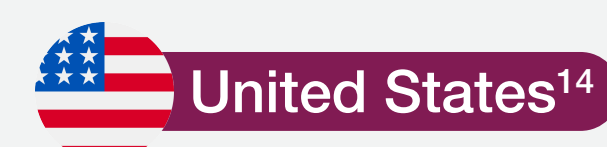

United States<sup>14</sup>

People living with HF need holistic and behavioral support beyond education to minimize disruption to their lives. This requires validation on the individuality of their HF journey and personalized self-care information to enable active participation and ownership of their health.

Transitional care and self-care interventions for people living with HF:

- ↑ Improve drug adherence rates<sup>15</sup>
- ↓ Reduce the risk of rehospitalization and death<sup>16</sup>
- ↑ Increase confidence, self-care, and quality of life<sup>17-21</sup>

Many transitional-care interventions for people living with HF do not integrally include patient participation via co-design and development of the intervention and/or co-authorship of the study publication

Person-Centered, Co-designed, and Co-developed Programs

- Involving patients in planning, administration, and evaluation can improve outcomes and reduce engagement barriers
- Person-centered care affirms the patient as an active partner in their care and respects their subjectivity, strengths, and preferences
- People living with HF receiving person-centered care have improved quality of life, self-care, and clinical status; less symptom burden; and shorter hospital stays<sup>22</sup>

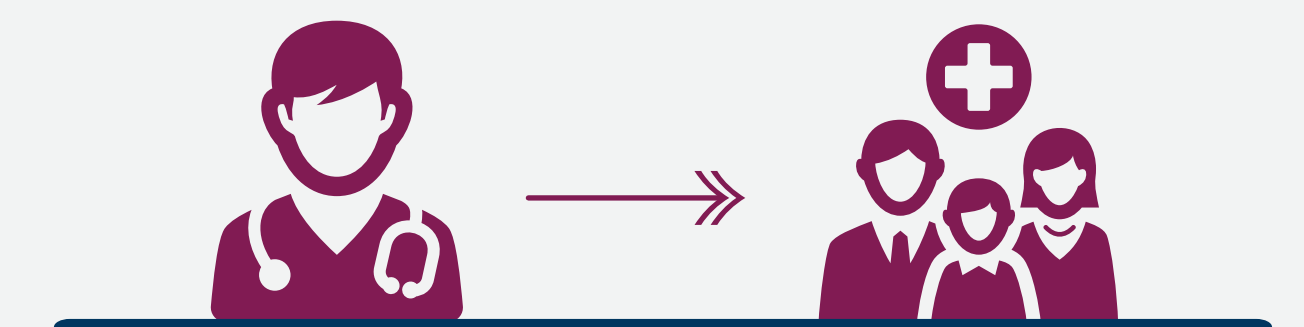

### References

1. Lippi G, Sanchis-Gomar F. *AME Med J.* 2020;5:15.
2. Savarese G, Lund LH. *Card Fail Rev.* 2017;3:7-11.
3. Hernandez AF, et al. *JAMA.* 2010;303:1716-22.
4. Wideqvist M, et al. *ESC Heart Fail.* 2021;8:1388-97.
5. Malik A, et al. *Am J Med.* 2020;133:84-94.
6. Woods L, et al. *Patient Exp J.* 2019;6:55-62.
7. Jaarsma T, et al. *Patient Educ Couns.* 2013;92:114-20.
8. Dunn Lopez K, et al. *Res Nurs Health.* 2021;44:71-80.
9. Berry C, McMurray J. *BMJ.* 2001;322:731-2.
10. Testa M, et al. *BMC Cardiovasc Disord.* 2020;20:522.
11. Leeming A, et al. *Eur J Cardiovasc Nurs.* 2014;13:162-7.
12. Ponikowski P, et al. *Eur J Heart Fail.* 2016;18:891-975.
13. Howlett JG, et al. *Can J Cardiol.* 2010;26:185-202.
14. Yancy CW, et al. *J Am Coll Cardiol.* 2013;62:e147-239.
15. Ruppert TM, et al. *J Am Heart Assoc.* 2016;5:e002606.
16. Feltner C, et al. *Ann Intern Med.* 2014;160:774-84.
17. Schofield T, et al. *BMJ Open Qual.* 2019;8:e000489.
18. Dalal HM, et al. *Programme Grants for Applied Research.* 2021;9:i-99.
19. Hägglund E, et al. *Scand Cardiovasc J.* 2015;49:193-9.
20. Seto E, et al. *J Med Internet Res.* 2012;14:e31.
21. Chen C, et al. *ESC Heart Fail.* 2019;6:164-73.
22. Ulin K, Malm D, Nygårdh A. *Curr Heart Fail Rep.* 2015;12:350-9.
